# Supplementary material for: Subclinical cardiac impairments in fetuses conceived through assisted reproductive technology by speckle tracking echocardiography
Source: publisher site journal article supplement (doi:10.1515/jpm-2023-0470), 2024-01-31
Supplement: Supplementary file 1 [file j_jpm-2023-0470_suppl_001.docx]

**Table S1:** 24-segment sphericity index of study groups

|  |  | SC | ART | Crude | Adjusted |
| --- | --- | --- | --- | --- | --- |
|  |  | (n=101) | (n=99) | P value | P value* |
| LV-basal | SI-1 | 2.44±0.47 | 2.35±0.50 | 0.199b | 0.477 |
| SI-2 | 2.28±0.40 | 2.21±0.43 | 0.212b | 0.437 |
| SI-3 | 2.15±0.36 | 2.09±0.38 | 0.243b | 0.413 |
| SI-4 | 2.06±0.34 | 2.00±0.35 | 0.278b | 0.391 |
| SI-5 | 2.00±0.33 | 1.95±0.33 | 0.283b | 0.337 |
| SI-6 | 1.98±0.33 | 1.93±0.32 | 0.273b | 0.274 |
| SI-7 | 1.99±0.33 | 1.93±0.32 | 0.230b | 0.198 |
| SI-8 | 2.02±0.34 | 1.96±0.31 | 0.183b | 0.130 |
| LV-mid | SI-9 | 2.06±0.35 | 2.00±0.31 | 0.159b | 0.090 |
| SI-10 | 2.11±0.36 | 2.04±0.31 | 0.155b | 0.070 |
| SI-11 | 2.17±0.37 | 2.10±0.32 | 0.170b | 0.062 |
| SI-12 | 2.23±0.39 | 2.17±0.32 | 0.214b | 0.065 |
| SI-13 | 2.30±0.40 | 2.24±0.34 | 0.257b | 0.072 |
| SI-14 | 2.39±0.43 | 2.33±0.36 | 0.308b | 0.082 |
| SI-15 | 2.48±0.45 | 2.43±0.38 | 0.346b | 0.090 |
| SI-16 | 2.58±0.48 | 2.53±0.40 | 0.392b | 0.109 |
| LV-apical | SI-17 | 2.67±0.49 | 2.62±0.41 | 0.449b | 0.133 |
| SI-18 | 2.76±0.51 | 2.72±0.42 | 0.531b | 0.174 |
| SI-19 | 2.84 (2.54-3.15) | 2.77 (2.55-3.10) | 0.782a | 0.252 |
| SI-20 | 3.04 (2.71-3.34) | 2.96 (2.72-3.31) | 0.971a | 0.337 |
| SI-21 | 3.42 (3.00-3.77) | 3.38 (3.09-3.77) | 0.958a | 0.449 |
| SI-22 | 4.24 (3.68-4.64) | 4.16 (3.76-4.63) | 0.893a | 0.538 |
| SI-23 | 6.03 (5.21-6.66) | 5.93 (5.34-6.59) | 0.878a | 0.591 |
| SI-24 | 11.7 (10.12-12.92) | 11.52 (10.38-12.94) | 0.864a | 0.627 |
| RV-basal | SI-1 | 1.89 (1.69-2.12) | 1.91 (1.65-2.26) | 0.574a | 0.292 |
| SI-2 | 1.82 (1.61-2.02) | 1.83 (1.59-2.08) | 0.822a | 0.576 |
| SI-3 | 1.73 (1.58-1.91) | 1.75 (1.52-1.98) | 0.910a | 0.930 |
| SI-4 | 1.66 (1.52-1.84) | 1.68 (1.43-1.88) | 0.689a | 0.763 |
| SI-5 | 1.61 (1.49-1.79) | 1.61 (1.39-1.79) | 0.534a | 0.532 |
| SI-6 | 1.60 (1.45-1.77) | 1.57 (1.36-1.75) | 0.361a | 0.374 |
| SI-7 | 1.59 (1.42-1.76) | 1.54 (1.33-1.73) | 0.265a | 0.277 |
| SI-8 | 1.58 (1.41-1.77) | 1.53 (1.34-1.72) | 0.191a | 0.248 |
| RV-mid | SI-9 | 1.59 (1.41-1.80) | 1.52 (1.32-1.73) | 0.149a | 0.224 |
| SI-10 | 1.60 (1.41-1.82) | 1.53 (1.33-1.74) | 0.125a | 0.214 |
| SI-11 | 1.63 (1.44-1.85) | 1.54 (1.35-1.75) | 0.095a | 0.224 |
| SI-12 | 1.65 (1.48-1.88) | 1.57 (1.39-1.79) | 0.077a | 0.230 |
| SI-13 | 1.71 (1.53-1.94) | 1.61 (1.44-1.82) | 0.057a | 0.217 |
| SI-14 | 1.77 (1.58-2.00) | 1.66 (1.49-1.89) | **0.041**a | 0.203 |
| SI-15 | 1.83 (1.64-2.10) | 1.72 (1.55-1.96) | **0.031**a | 0.169 |
| SI-16 | 1.95 (1.71-2.20) | 1.79 (1.63-2.06) | **0.026**a | 0.132 |
|  | SI-17 | 2.07 (1.81-2.33) | 1.90 (1.73-2.18) | **0.021**a | 0.096 |
| RV-apical | SI-18 | 2.22 (1.99-2.50) | 2.06 (1.88-2.34) | **0.016**a | 0.062 |
|  | SI-19 | 2.42 (2.19-2.72) | 2.29 (2.09-2.61) | **0.018**a | **0.045** |
|  | SI-20 | 2.69 (2.49-3.17) | 2.59 (2.36-2.91) | **0.028**a | **0.042** |
|  | SI-21 | 3.17 (2.92-3.82) | 3.14 (2.79-3.44) | 0.073a | 0.060 |
| SI-22 | 4.10 (3.69-4.86) | 3.98 (3.56-4.43) | 0.115a | 0.089 |
| SI-23 | 5.98 (5.36-7.05) | 5.81 (5.12-6.53) | 0.165a | 0.118 |
| SI-24 | 11.72 (10.49-13.85) | 11.35 (9.98-12.94) | 0.182a | 0.136 |

aMann Whitney U test. bIndependent t-test. *P values calculated by linear regression adjusted for maternal age, gestational age and parity. Values are expressed as mean ± standard deviation or median (interquartile range). SC, spontaneously conceived pregnancies; ART, pregnancies conceived by assisted reproductive technology. LV, left ventricle; RV, right ventricle; SI, sphericity index. The number represents the corresponding segment and segments1-8,9–16,17–24 represent the basal, mid and apical sections, respectively. The bold characters were used to define the significant “p” values p<0.05.

**Table S2:** 24-segment end-diastolic diameter of study groups

|  |  | SC | ART | Crude | Adjusted |
| --- | --- | --- | --- | --- | --- |
|  |  | (n=101) | (n=99) | P value | P value* |
| LV-basal | ED-1, mm | 8.5 (7.3-9.8) | 8.8 (7.6-10.2) | 0.374a | 0.947 |
|  | ED-2, mm | 9.2±1.6 | 9.4±1.7 | 0.468b | 0.958 |
|  | ED-3, mm | 9.8±1.6 | 9.9±1.7 | 0.585b | 0.971 |
|  | ED-4, mm | 10.2±1.7 | 10.3±1.8 | 0.686b | 0.938 |
|  | ED-5, mm | 10.5±1.7 | 10.6±1.9 | 0.734b | 0.832 |
|  | ED-6, mm | 10.6±1.7 | 10.7±1.9 | 0.712b | 0.645 |
|  | ED-7, mm | 10.6±1.7 | 10.7±1.9 | 0.652b | 0.437 |
|  | ED-8, mm | 10.4±1.7 | 10.5±1.9 | 0.591b | 0.283 |
| LV-mid | ED-9, mm | 10.2±1.6 | 10.3±1.9 | 0.567b | 0.208 |
|  | ED-10, mm | 10.0±1.6 | 10.1±1.8 | 0.603b | 0.196 |
|  | ED-11, mm | 9.7±1.6 | 9.8±1.7 | 0.691b | 0.229 |
|  | ED-12, mm | 9.4±1.6 | 9.5±1.6 | 0.816b | 0.300 |
|  | ED-13, mm | 9.1 (7.9-10.1) | 9.2 (8.1-10.1) | 0.819a | 0.395 |
|  | ED-14, mm | 8.7 (7.7-9.8) | 8.8 (7.9-9.7) | 0.834a | 0.484 |
|  | ED-15, mm | 8.4 (7.4-9.4) | 8.5 (7.5-9.3) | 0.875a | 0.563 |
|  | ED-16, mm | 8.1 (7.2-9.1) | 8.1 (7.2-9.0) | 0.902a | 0.638 |
| LV-apical | ED-17, mm | 7.8 (6.9-8.9) | 7.9 (7.0-8.7) | 0.964a | 0.733 |
|  | ED-18, mm | 7.5 (6.7-8.6) | 7.5 (6.7-8.5) | 0.936a | 0.866 |
|  | ED-19, mm | 7.4±1.4 | 7.3±1.2 | 0.536b | 0.999 |
|  | ED-20, mm | 6.9±1.3 | 6.8±1.2 | 0.443b | 0.887 |
|  | ED-21, mm | 6.1±1.2 | 6.0±1.1 | 0.380b | 0.810 |
|  | ED-22, mm | 5.0±1.0 | 4.9±0.9 | 0.350b | 0.773 |
|  | ED-23, mm | 3.5±0.7 | 3.4±0.6 | 0.334b | 0.758 |
|  | ED-24, mm | 1.8±0.4 | 1.8±0.3 | 0.322b | 0.739 |
| RV-basal | ED-1, mm | 8.4 (7.1-9.5) | 8.1 (7.4-9.7) | 0.945a | 0.906 |
|  | ED-2, mm | 8.7 (7.5-10.1) | 8.6 (7.7-10.0) | 0.721a | 0.519 |
|  | ED-3, mm | 9.2 (7.8-10.4) | 9.2 (8.0-10.6) | 0.495a | 0.240 |
|  | ED-4, mm | 9.5±1.9 | 9.9±2.1 | 0.213b | 0.100 |
|  | ED-5, mm | 9.8±2.0 | 10.2±2.1 | 0.140b | **0.043** |
|  | ED-6, mm | 10.0±2.0 | 10.5±2.1 | 0.094b | **0.021** |
|  | ED-7, mm | 10.1±2.1 | 10.6±2.0 | 0.064b | **0.012** |
|  | ED-8, mm | 10.1±2.1 | 10.7±2.0 | **0.046**b | **0.008** |
| RV-mid | ED-9, mm | 10.1±2.1 | 10.7±2.0 | **0.034**b | **0.007** |
|  | ED-10, mm | 10.0±2.1 | 10.6±2.0 | **0.026**b | **0.007** |
|  | ED-11, mm | 9.8±2.1 | 10.5±1.9 | **0.021**b | **0.006** |
|  | ED-12, mm | 9.6±2.0 | 10.3±1.9 | **0.016**b | **0.006** |
|  | ED-13, mm | 9.1 (7.8-10.9) | 10.0 (8.6-11.3) | **0.013**a | **0.006** |
|  | ED-14, mm | 8.7 (7.5-10.5) | 9.7 (8.2-10.9) | **0.010**a | **0.005** |
|  | ED-15, mm | 8.3 (7.2-10.2) | 9.4 (7.9-10.5) | **0.008**a | **0.004** |
|  | ED-16, mm | 7.9 (7.0-9.7) | 8.9 (7.6-10.0) | **0.009**a | **0.004** |
| RV-apical | ED-17, mm | 7.4 (6.6-9.1) | 8.4 (7.1-9.4) | **0.011**a | **0.004** |
|  | ED-18, mm | 7.0 (6.0-8.4) | 7.7 (6.6-8.7) | **0.016**a | **0.004** |
|  | ED-19, mm | 6.6±1.5 | 7.1±1.5 | **0.012**b | **0.006** |
|  | ED-20, mm | 5.8±1.4 | 6.3±1.5 | **0.020**b | **0.010** |
|  | ED-21, mm | 4.9±1.2 | 5.3±1.3 | **0.034**b | **0.018** |
|  | ED-22, mm | 3.9±1.0 | 4.2±1.1 | 0.050b | **0.027** |
|  | ED-23, mm | 2.7±0.7 | 2.9±0.8 | 0.064b | **0.034** |
|  | ED-24, mm | 1.4±0.4 | 1.5±0.4 | 0.074b | **0.038** |

aMann Whitney U test. bIndependent t-test. *P values calculated by linear regression adjusted for maternal age, gestational age and parity. Values are expressed as mean ± standard deviation or median (interquartile range). SC, spontaneously conceived pregnancies; ART, pregnancies conceived by assisted reproductive technology. LV, left ventricle; RV, right ventricle; ED, end-diastolic diameter. The number represents the corresponding segment and segments1-8,9–16,17–24 represent the basal, mid and apical sections, respectively. The bold characters were used to define the significant “p” values p<0.05.

**Table S3:** 24-segment fractional shortening of study groups.

|  |  | SC | ART | Crude | Adjusted |
| --- | --- | --- | --- | --- | --- |
|  |  | (n=101) | (n=99) | P value | P value* |
| LV-basal | FS-1, % | 2.4±11.4 | 2.4±13.8 | 0.970b | 0.756 |
|  | FS-2, % | 7.1±9.2 | 6.5±11.3 | 0.681b | 0.546 |
|  | FS-3, % | 11.1±8.1 | 10.0±9.7 | 0.381b | 0.368 |
|  | FS-4, % | 14.4±7.7 | 13.0±8.8 | 0.219b | 0.272 |
|  | FS-5, % | 17.1±7.7 | 15.5±8.1 | 0.155b | 0.252 |
|  | FS-6, % | 19.4±7.8 | 17.8±7.6 | 0.146b | 0.301 |
|  | FS-7, % | 21.3±8.0 | 19.9±7.1 | 0.172b | 0.417 |
|  | FS-8, % | 23.1±8.2 | 21.8±7.0 | 0.225b | 0.579 |
| LV-mid | FS-9, % | 24.8±8.5 | 23.6±7.2 | 0.278b | 0.709 |
|  | FS-10, % | 26.5±8.6 | 25.2±7.6 | 0.289b | 0.721 |
|  | FS-11, % | 28.1±8.5 | 26.8±8.2 | 0.257b | 0.624 |
|  | FS-12, % | 29.8±8.4 | 28.3±8.8 | 0.200b | 0.465 |
|  | FS-13, % | 31.5±8.4 | 29.6±9.4 | 0.139b | 0.303 |
|  | FS-14, % | 32.9 (27.7-39.5) | 31.3 (26.3-37.0) | 0.153a | 0.180 |
|  | FS-15, % | 34.1 (29.3-40.8) | 32.5 (26.5-38.8) | 0.143a | 0.107 |
|  | FS-16, % | 35.8 (30.6-41.9) | 34.8 (27.8-39.4) | 0.134a | 0.071 |
| LV-apical | FS-17, % | 37.4 (31.1-44.3) | 36.6 (28.6-41.4) | 0.108a | 0.056 |
|  | FS-18, % | 38.5 (31.7-45.9) | 37.1 (30.0-42.7) | 0.132a | 0.055 |
|  | FS-19, % | 39.3 (32.5-46.5) | 37.1 (30.5-43.2) | 0.159a | 0.063 |
|  | FS-20, % | 39.8 (31.9-47.3) | 37.8 (31.0-44.9) | 0.191a | 0.082 |
|  | FS-21, % | 40.5 (31.0-48.6) | 37.8 (30.9-45.9) | 0.229a | 0.106 |
|  | FS-22, % | 41.5 (31.9-49.2) | 38.1 (30.9-46.8) | 0.266a | 0.128 |
|  | FS-23, % | 41.8 (31.2-48.8) | 38.3 (30.9-47.6) | 0.306a | 0.144 |
|  | FS-24, % | 41.9 (30.9-49.5) | 38.4 (30.8-48.1) | 0.308a | 0.153 |
| RV-basal | FS-1, % | 3.7 (-3.3-12.8) | 3.7 (-7.4-11.3) | 0.265a | 0.315 |
|  | FS-2, % | 7.6±10.2 | 5.8±12.7 | 0.248b | 0.379 |
|  | FS-3, % | 10.6±9.3 | 9.0±11.0 | 0.251b | 0.428 |
|  | FS-4, % | 13.2±8.7 | 11.7±9.9 | 0.246b | 0.448 |
|  | FS-5, % | 15.4±8.2 | 14.0±9.2 | 0.234b | 0.426 |
|  | FS-6, % | 17.3±7.7 | 15.8±8.5 | 0.215b | 0.357 |
|  | FS-7, % | 18.8±7.2 | 17.3±8.1 | 0.194b | 0.264 |
|  | FS-8, % | 20.0±6.7 | 18.5±8.0 | 0.178b | 0.182 |
| RV-mid | FS-9, % | 20.9±6.5 | 19.4±8.1 | 0.172b | 0.131 |
|  | FS-10, % | 21.5±6.3 | 20.0±8.3 | 0.176b | 0.107 |
|  | FS-11, % | 22.1 (17.7-26.1) | 20.4 (15.6-24.7) | 0.094a | 0.104 |
|  | FS-12, % | 22.4 (18.0-26.0) | 20.4 (16.6-24.9) | 0.128a | 0.117 |
|  | FS-13, % | 22.1 (17.6-26.5) | 20.6 (17.1-25.2) | 0.179a | 0.151 |
|  | FS-14, % | 21.2 (17.8-27.5) | 21.4 (17.0-25.1) | 0.236a | 0.215 |
|  | FS-15, % | 21.7 (17.9-27.6) | 21.6 (16.1-25.6) | 0.307a | 0.327 |
|  | FS-16, % | 22.6±8.0 | 21.7±9.2 | 0.493b | 0.495 |
| RV-apical | FS-17, % | 22.4±8.8 | 21.7±9.7 | 0.614b | 0.701 |
|  | FS-18, % | 21.9±10.0 | 21.4±10.6 | 0.733b | 0.900 |
|  | FS-19, % | 23.2 (15.1-28.8) | 22.0 (14.8-27.1) | 0.573a | 0.934 |
|  | FS-20, % | 23.4 (14.7-29.5) | 22.7 (12.5-28.4) | 0.672a | 0.818 |
|  | FS-21, % | 22.8 (13.7-29.3) | 21.2 (10.4-29.8) | 0.812a | 0.746 |
|  | FS-22, % | 22.5 (12.1-29.5) | 22.0 (9.2-30.6) | 0.857a | 0.701 |
|  | FS-23, % | 23.4 (10.5-29.4) | 21.5 (8.8-31.7) | 0.853a | 0.672 |
|  | FS-24, % | 23.5 (9.4-29.4) | 21.6 (8.0-32.0) | 0.882a | 0.655 |

aMann Whitney U test. bIndependent t-test. *P values calculated by linear regression adjusted for maternal age, gestational age and parity. Values are expressed as mean ± standard deviation or median (interquartile range). SC, spontaneously conceived pregnancies; ART, pregnancies conceived by assisted reproductive technology. LV, left ventricle; RV, right ventricle; FS, fraction shortening. The number represents the corresponding segment and segments1-8,9–16,17–24 represent the basal, mid and apical sections, respectively. The bold characters were used to define the significant “p” values p<0.05.
